# Supplementary material
Source: publisher figshare collection journal article supplement (https://tandf.figshare.com/ndownloader/files/14718917)
Supplement: Supplementary file 1 [file 14718917]

Table A1. Studies comparing NASA/NOAA and ESA (Copernicus) Remote Sensing Bio-Geophysical Products (RS-BGP). Italic are NASA/NOAA and Bold are ESA products. Underlined are mixed (NASA/NOAA+ESA) products.

| **Product** | **Comparison** | **Results** | **Reference** |
| --- | --- | --- | --- |
| **Albedo** | *MODIS* and **PROBA -V** albedo and direct validation using ground observations | - PROBA-V and MODIS C6 achieved a good agreement (RMSE ca. 0.03) | Roujean et al. (2018) |
| **FAPAR** | *MODIS*, **CYCLOPES (SPOT-VGT), JRC** *(SeaWifs)***, and GLOBCARBON (SPOT-VGT)** over Northern eurasia for the year 2000. | - Products achieved similar results in deciduous broadleaf forests and croplands. - Low agreement found in needleleaf and mixed forests and grassland/shrublands. - MODIS and CYCLOPES reached high FAPAR values. - JRC and GLOBCARBON results were similarly low. | McCallum et al. (2010) |
| *MODIS*, **MERIS**, *SeaWIFS*, *MODIS-TIP*, **SPOT-VEG**, *AVHRR* across Australia | - High agreement among products was found in savanna/ grassland, shrubland and managed land (agricultural land) biomes. - Low agreement was found in forest biomes. | Pickett-Heaps et al. (2014) |
| **LAI/ FAPAR** | *MODIS*, Formosat, **GEOLAND-2(SPOT-VGT)** and in situ measurementsover crops in southwest France | - Results from all products were in good agreement with a significant positive correlation. - Uncertainty LAI: 0.35 - Uncertainty FAPAR: 0.07 | Claverie et al. (2013) |
| **FCOVER/ LAI/ FAPAR** | The spatial and temporal consistencies of GEOV1 products (**FCOVER, LAI, FAPAR using SPOT-VGT**: GEOLAND2 project) were assessed by intercomparison with reference global products (*MODIS c5***, CYCLOPES v3.1 (SPOT-VGT)**, GLOBCARBON v2 LAI **(SPOT-VGT, ENVISAT/AATSR**), and JRC *SeaWIFS* FAPAR) | - GEOV1 products presented good performances. - GEOV1 products achieved higher quality in comparison with the reference products used in the study. - GEOV1 products had a lack of spatio-temporal continuity (e.g. over high latitudes and equatorial regions). | Camacho, Cernicharo, Lacaze, Baret, & Weiss, (2013) |
| **FCOVER** | **GEOV1 Fractional Vegetation Cover, FVC (SPOT-VGT)** | - FVC was overestimated in croplands (0.20). | Mu et al., (2015) |
| **LAI** | *ECOCLIMAP (NOAA/AVHRR)*, **GLOBCARBON (SPOT-VEG**), **CYCLOPES (SPOT-VEG**), and *MODIS*. | - Results were more similar over croplands and grasslands than forests. - ECOCLIMAP was the only product with no spatiotemporal gaps. | Garrigues et al. (2008) |
| **NDVI** | *GIMMS (from AVHRR)* and *MODIS NDVI* | - The trends of GIMMS NDVI were in overall agreement with MODIS NDVI data except for artic areas in Northern Hemisphere and South America and Australia in Southern Hemisphere. | Fensholt & Proud, (2012) |
| **LST** | *EOS-MODIS MOD11_L2/MYD11_L2 LS* | - The M*D11_L2 product achieved lower uncertainty. - Underestimation of ca. −0.15 K was observed with uncertainty values ± 2K in a rice crop and a Mediterranean shrubland. | Niclòs, Valiente, Barberà, & Coll (2015) |
| **Land Cover** | **ESA CCI (ENVISAT MERIS, ASAR/ SPOT-VGT)**, **GLC2000 (SPOT-VGT),** **GlobCover (ENVISAT MERIS),** GlobeLand30 (*Landsat* and HJ-A1/B: Chinese), *MCD12Q1*, GLC SHARE (global land cover products FAO, LCCS) IIASA IFPRI Cropland Maps (global land cover products and national statistics), GFSAD Crop Extent for Africa (Landsat 8 and Sentinel 2) in five Sahelian countries | - ESA CCI 2013, MODIS 2013 and GlobCover 2009 outperformed GLC2000. - GFSAD30 and GLOBELand30 obtained the best accuracy in croplands. (GFSAD30: 64.19% and GlobeLand30: 68.89%). - ESA CCI and MODIS achieved best accuracies in mixed crops. - All products reported accuracies lower than 75%. - All products overestimated cultivated areas (i.e. 170% on average). | Samasse et al. (2018) |
| FAO-GLCshare (FAO Global Land Cover Network), Geowiki Hybrid-1 IIASA (MODIS, SPOT4, MERIS), **GLC2000-JRC (SPOT-4/VGT**), *GLCNMO v2-ISCGM (MODIS)*, GlobeLand30 (*Landsat TM/ETM7*, and HJ-A1/B: Chinese), **GlobCover 2009 (MERIS)**, **LC-CCI 2010** **(MERIS, SPOT-VGT),** **LC-CCI 2015-ESA(MERIS, PROBA-V, SPOT-VGT, AVHRR),** and *MODISLC* *2010* (*MOD12Q1 v051*). | - Results were substantially different among products. - FAO-GLCshare and GlobeLand30 were the most suitable datasets to monitor croplands, - LC-CCI2010 overestimated cropland areas in Africa. - GLC2000 reported low accuracy. | Pérez-Hoyos, Rembold, Kerdiles, & Gallego, (2017) |
| **Corine Land Cover (CLC) and ESA CCI (LUCAS Land use dataset as ground truth)** implications for fire modelling | - CCI-LC reached a higher agreement with LUCAS than CLC: 59% and 56%, respectively. - In terms of wildfire occurrence estimation:   - Both datasets performed similarly at European scale.  - CLC provided better results at local scale. | Vilar, Garrido, Echavarría, Martínez-Vega, & Martín, (2019) |
| **BA** | *FireCCI50* (MODIS) and **FireCCI41 (MERIS),** *GFED4* and *MCD64A1* | - Temporal and spatial trends were consistent among compared products. - FireCCI50 detected small fire patches better than previous versions. | Chuvieco et al. (2016) |
| **Hybrid product using MERIS and MODIS product (ESA FIRE_CCI project)** compared with existing *MODIS Burned Area (BA) products* | - MERIS BA accuracy was in line with MODIS BA products (MCD45 and MCD64) (overall accuracy higher than 0.99). - MERIS, GEFD v4 and MCD45 achieved high agreement (r2 > 0.99). - Seasonal trends between BA MERIS and existing products were similar (e.g. magnitude through temporal series). | Alonso-Canas & Chuvieco, (2015) |

References

Alonso-Canas, I., & Chuvieco, E. (2015). Global burned area mapping from ENVISAT-MERIS and MODIS active fire data. *Remote Sensing of Environment*, *163*, 140–152. https://doi.org/10.1016/j.rse.2015.03.011

Camacho, F., Cernicharo, J., Lacaze, R., Baret, F., & Weiss, M. (2013). GEOV1: LAI, FAPAR essential climate variables and FCOVER global time series capitalizing over existing products. Part 2: Validation and intercomparison with reference products. *Remote Sensing of Environment*, *137*, 310–329. https://doi.org/10.1016/j.rse.2013.02.030

Chuvieco, E., Yue, C., Heil, A., Mouillot, F., Alonso-Canas, I., Padilla, M., … Tansey, K. (2016). A new global burned area product for climate assessment of fire impacts. *Global Ecology and Biogeography*, *25*(5), 619–629. https://doi.org/10.1111/geb.12440

Claverie, M., Vermote, E. F., Weiss, M., Baret, F., Hagolle, O., & Demarez, V. (2013). Validation of coarse spatial resolution LAI and FAPAR time series over cropland in southwest France. *Remote Sensing of Environment*, *139*, 216–230. https://doi.org/10.1016/j.rse.2013.07.027

Fensholt, R., & Proud, S. R. (2012). Evaluation of Earth Observation based global long term vegetation trends - Comparing GIMMS and MODIS global NDVI time series. *Remote Sensing of Environment*, *119*, 131–147. https://doi.org/10.1016/j.rse.2011.12.015

Garrigues, S., Lacaze, R., Baret, F., Morisette, J. T., Weiss, M., Nickeson, J. E., … Yang, W. (2008). Validation and intercomparison of global Leaf Area Index products derived from remote sensing data. *Journal of Geophysical Research: Biogeosciences*, *113*(2). https://doi.org/10.1029/2007JG000635

McCallum, I., Wagner, W., Schmullius, C., Shvidenko, A., Obersteiner, M., Fritz, S., & Nilsson, S. (2010). Comparison of four global FAPAR datasets over Northern Eurasia for the year 2000. *Remote Sensing of Environment*, *114*(5), 941–949. https://doi.org/10.1016/j.rse.2009.12.009

Mu, X., Huang, S., Ren, H., Yan, G., Song, W., & Ruan, G. (2015). Validating GEOV1 fractional vegetation cover derived from coarse-resolution remote sensing images over croplands. *IEEE Journal of Selected Topics in Applied Earth Observations and Remote Sensing*, *8*(2), 439–446. https://doi.org/10.1109/JSTARS.2014.2342257

Niclòs, R., Valiente, J. A., Barberà, M. J., & Coll, C. (2015). An autonomous system to take angular thermal-infrared measurements for validating satellite products. *Remote Sensing*, *7*(11), 15269–15294. https://doi.org/10.3390/rs71115269

Pérez-Hoyos, A., Rembold, F., Kerdiles, H., & Gallego, J. (2017). Comparison of global land cover datasets for cropland monitoring. *Remote Sensing*, *9*(11). https://doi.org/10.3390/rs9111118

Pickett-Heaps, C. A., Canadell, J. G., Briggs, P. R., Gobron, N., Haverd, V., Paget, M. J., … Raupach, M. R. (2014). Evaluation of six satellite-derived Fraction of Absorbed Photosynthetic Active Radiation (FAPAR) products across the Australian continent. *Remote Sensing of Environment*, *140*, 241–256. https://doi.org/10.1016/j.rse.2013.08.037

Roujean, J. L., Leon-Tavares, J., Smets, B., Claes, P., Camacho De Coca, F., & Sanchez-Zapero, J. (2018). Surface albedo and toc-r 300 m products from PROBA-V instrument in the framework of Copernicus Global Land Service. *Remote Sensing of Environment*, *215*(May), 57–73. https://doi.org/10.1016/j.rse.2018.05.015

Samasse, K., Hanan, N., Tappan, G., Diallo, Y., Samasse, K., Hanan, N. P., Diallo, Y. (2018). Assessing Cropland Area in West Africa for Agricultural Yield Analysis. *Remote Sensing*, *10*(11), 1785. https://doi.org/10.3390/rs10111785

Vilar, L., Garrido, J., Echavarría, P., Martínez-Vega, J., & Martín, M. P. (2019). Comparative analysis of CORINE and climate change initiative land cover maps in Europe: Implications for wildfire occurrence estimation at regional and local scales. *International Journal of Applied Earth Observation and Geoinformation*, *78*(January), 102–117. https://doi.org/10.1016/j.jag.2019.01.019
